# Supplementary material for: Fabrication of highly permeable thin-film nanocomposite forward osmosis membranes via the design of novel freestanding robust nanofiber substrates
Source: Royal Society of Chemistry journal article supplement (doi:10.1039/c7ta11320j), 2018-01-01
Supplement: c7ta11320j1.pdf [file c7ta11320j1.pdf]

# **Fabrication of highly permeable thin-film nanocomposite forward osmosis membranes via design novel freestanding robust nanofiber substrates**

**M. Obaid<sup>1</sup>, Yesol Kang<sup>1</sup>, Sungrok Wang<sup>2</sup>, Myung-Han Yoon<sup>2</sup>, Chang-Min Kim<sup>1</sup>, Jun-ho Song<sup>1</sup> and In S. Kim<sup>1,\*</sup>**

<sup>1</sup>Global Desalination Research Center (GDRC), School of Earth Sciences and Environmental Engineering, Gwangju Institute of Science and Technology (GIST), 123 Cheomdangwagi-ro, Buk-gu, Gwangju 61005, Republic of Korea.

<sup>2</sup>School of Materials Science and Engineering, Gwangju Institute of Science and Technology (GIST), 123 Cheomdangwagi-ro, Buk-gu, Gwangju 61005, Republic of Korea.

**Corresponding author:**

Tel: +82 62 715 2436

Fax: +82 62 715 2584,

E-mail: [iskim@gist.ac.kr](mailto:iskim@gist.ac.kr)

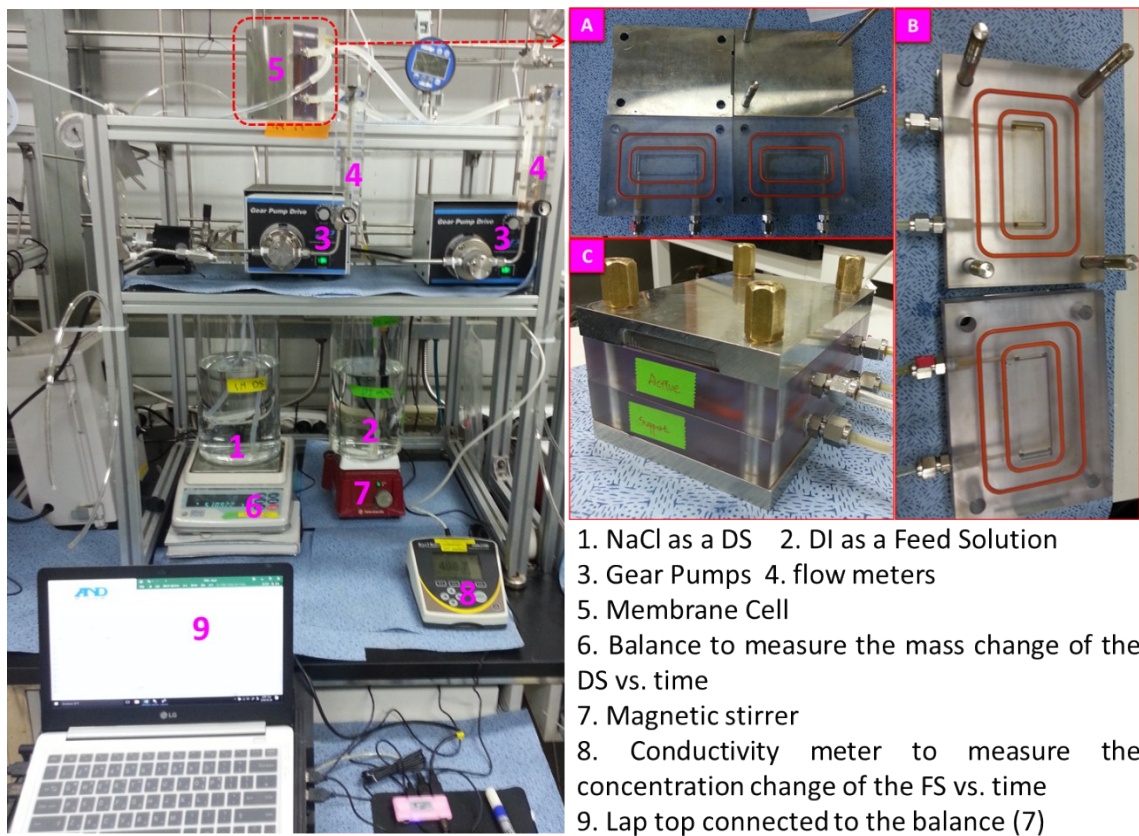

**Figure S1. Photograph of the laboratory-scale forward osmosis setup. (A) The cell body and cell holder, (B) inserting the cell body into the cell holder, and (C) an assembled Membrane Cell.**

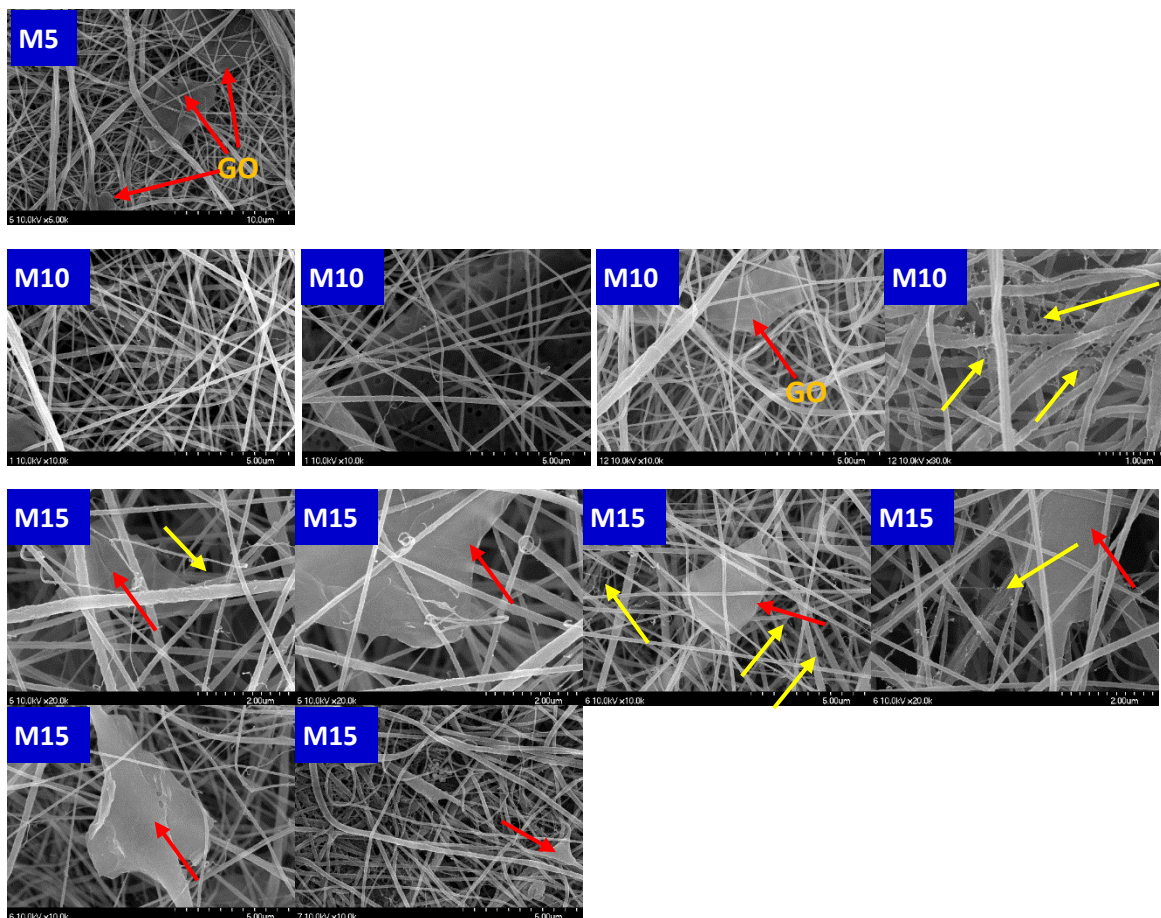

**Figure S2. FE-SEM images of the electrospun support layers embedding high concentration of GO; 5 (M5), 10 (M10), and 15 wt. % (M15). The red arrows indicate the GO, while the yellow arrows to the crosslinking (branching).**

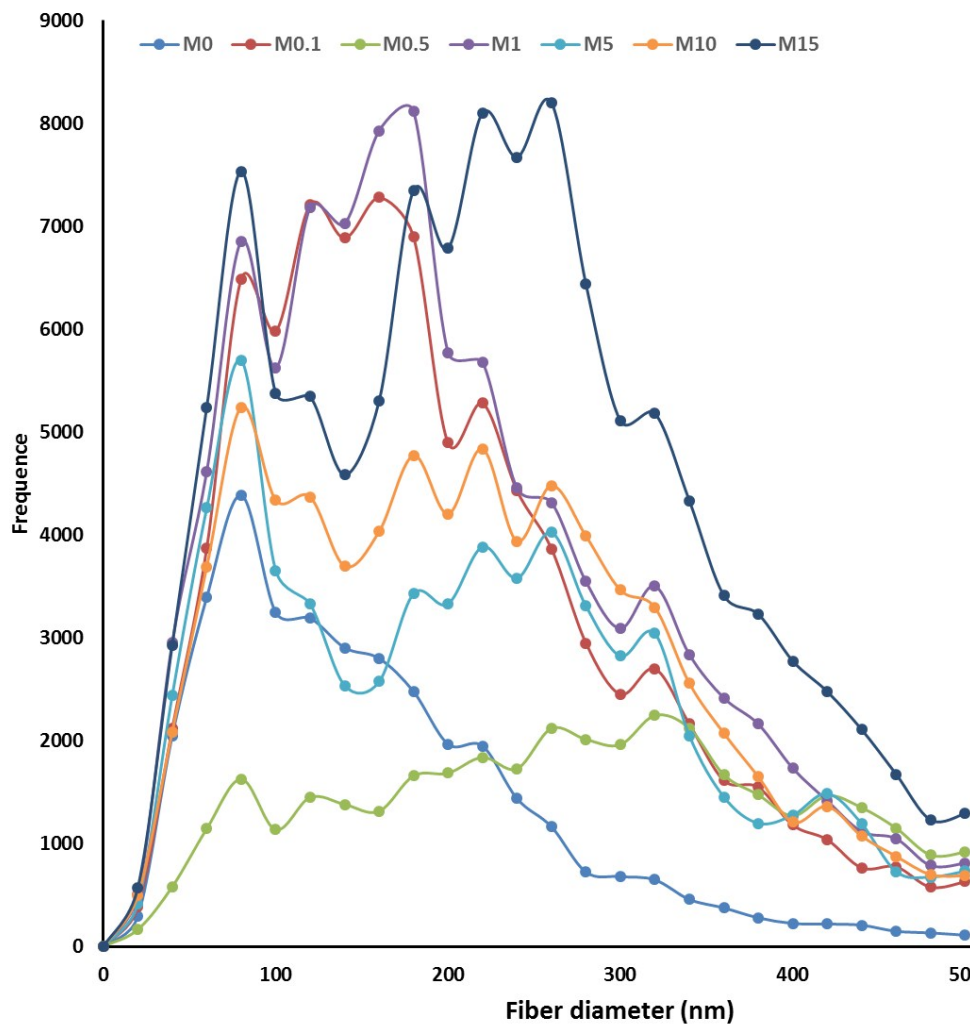

**Figure S3. The histogram of the nanofiber diameter distribution.**

**Table S1: porosimetry data of the pristine and nanocomposite EN substrates**

| Substrate | TIV (ml/g) | APD (nm) |         |        |
|-----------|------------|----------|---------|--------|
|           |            | A        | V       | 4V/A   |
| M0        | 4.07       | 304      | 27922.3 | 1960.5 |
| M0.1      | 2.64       | 487.7    | 19938.9 | 1703.3 |
| M0.5      | 2.31       | 607.5    | 19218.6 | 1966.7 |
| M1        | 3.05       | 338.1    | 26410   | 1635.8 |
| M5        | 5.15       | 61       | 23548.4 | 684.1  |
| M10       | 4.38       | 80.3     | 10702.5 | 644.9  |
| M15       | 3.85       | 75.5     | 20711.8 | 862.6  |

TIV, Total Intrusion Volume; TPA, Total Pore Area; APD, Average Pore Diameter.

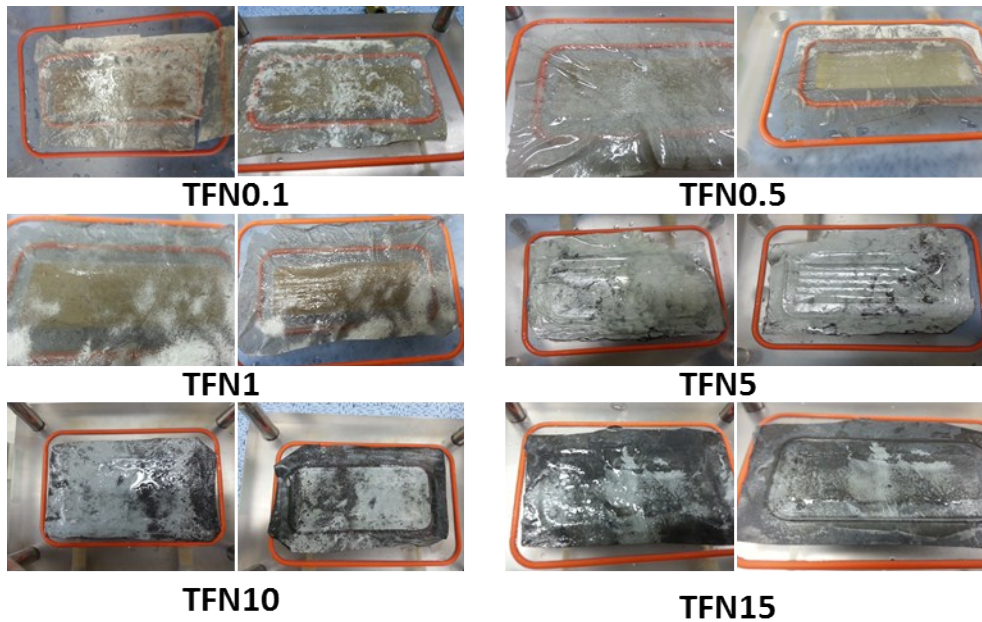

**Figure S4. The TFC and TFN membranes (left) before used (right) after used for 30h in FO lab scale system.**

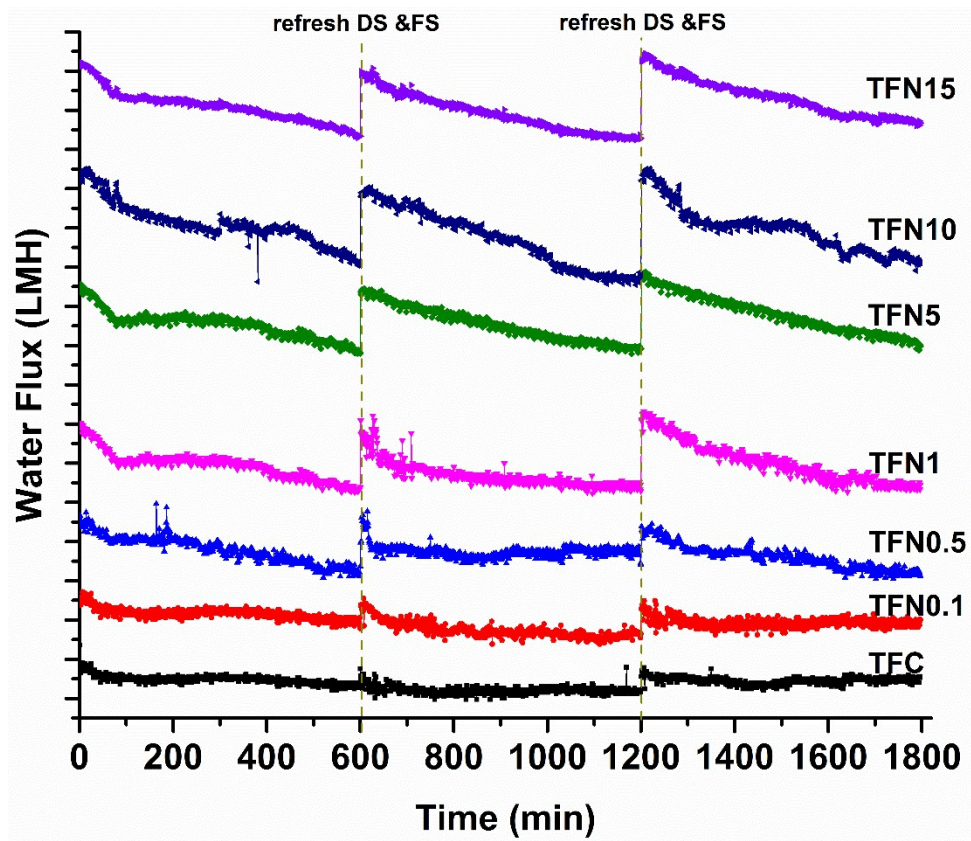

Figure S5. FO water flux of TFC/TFN membranes over long run test (30h), where the DS and FS were refreshed every 10h, same as Fig.10B in form of stacked lines.

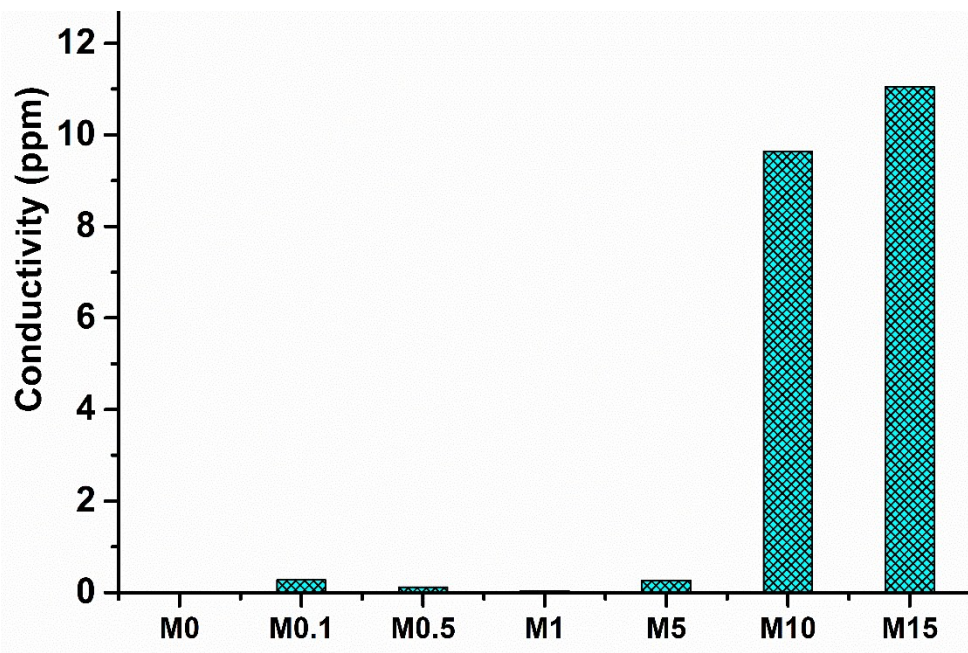

**Figure S6. Stability of GO in the fabricated membranes via measuring of the conductivity of the water after sonicating, stirring the membranes in it.**
